# Supplementary material for: Ebola virus-mediated T-lymphocyte depletion is the result of an abortive infection
Source: PubMed Central journal article supplement (PMC6812753; doi:10.1371/journal.ppat.1008068), 2019-10-24
Supplement: ppat.1008068.s001.pdf [file ppat.1008068.s001.pdf]

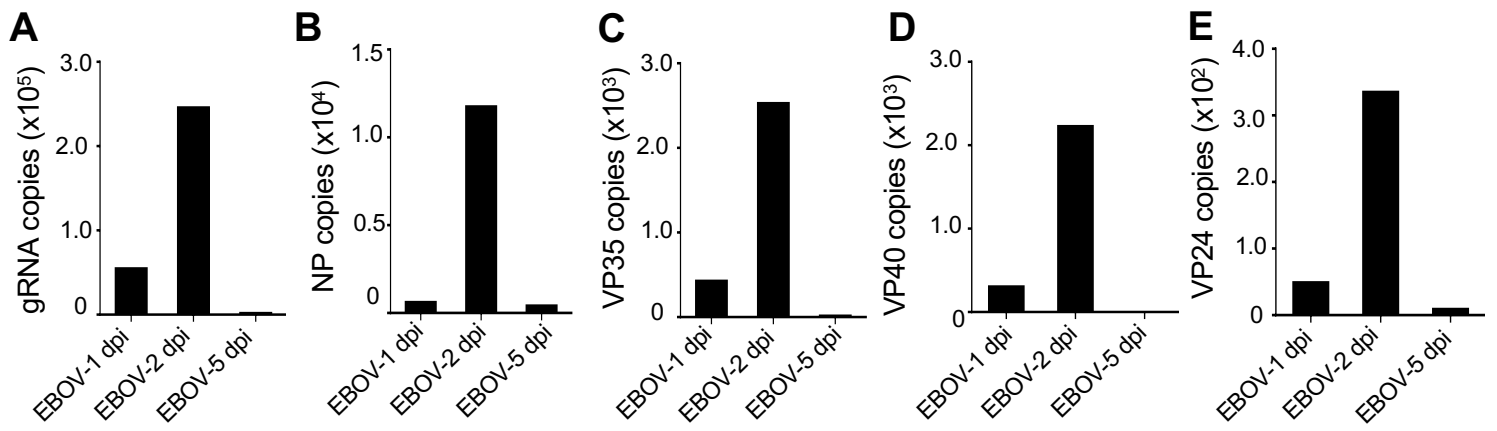

**Supplementary Figure 1. Abortive EBOV infection in Jurkat cells.** The number of viral genomic RNA (A) and specific viral mRNAs (B-E) copies/ng in CD4<sup>+</sup> T-cells exposed to EBOV for 1, 2 and 5 days, determined by DDRT-PCR with background signals in mock-infected cells subtracted.
