# Supplementary material for: Ebola virus-mediated T-lymphocyte depletion is the result of an abortive infection
Source: PubMed Central journal article supplement (PMC6812753; doi:10.1371/journal.ppat.1008068), 2019-10-24
Supplement: ppat.1008068.s002.pdf [file ppat.1008068.s002.pdf]

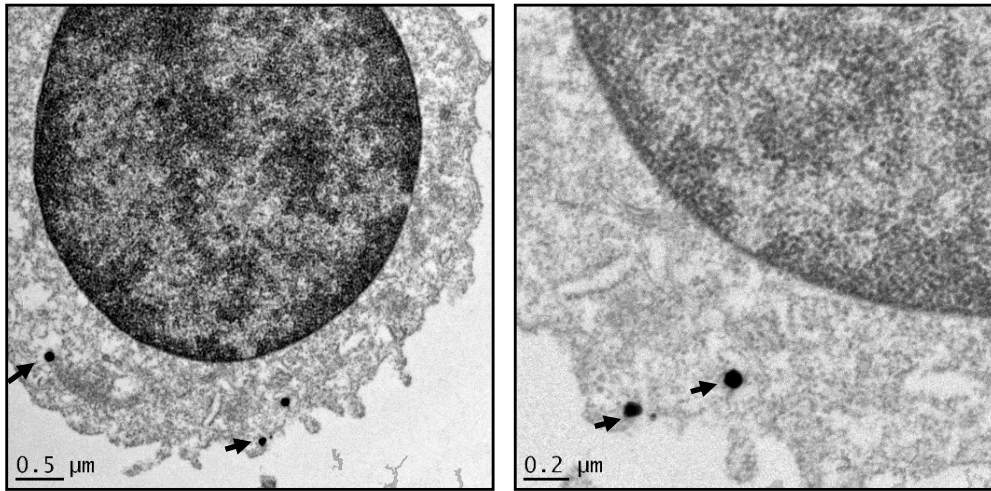

**Supplementary Figure 2.** Dual immuno-gold labeling TEM of CD4<sup>+</sup> T-cells mock-exposed to EBOV: immunostained for CD3 with ~40 nm gold particles (black arrows) and for EBOV antigens with ~15 nm gold particles (not present). TEM of CD4<sup>+</sup> T-cells exposed to EBOV is shown in Figure 2B.
