# Supplementary material for: Ebola virus-mediated T-lymphocyte depletion is the result of an abortive infection
Source: PubMed Central journal article supplement (PMC6812753; doi:10.1371/journal.ppat.1008068), 2019-10-24
Supplement: ppat.1008068.s003.pdf [file ppat.1008068.s003.pdf]

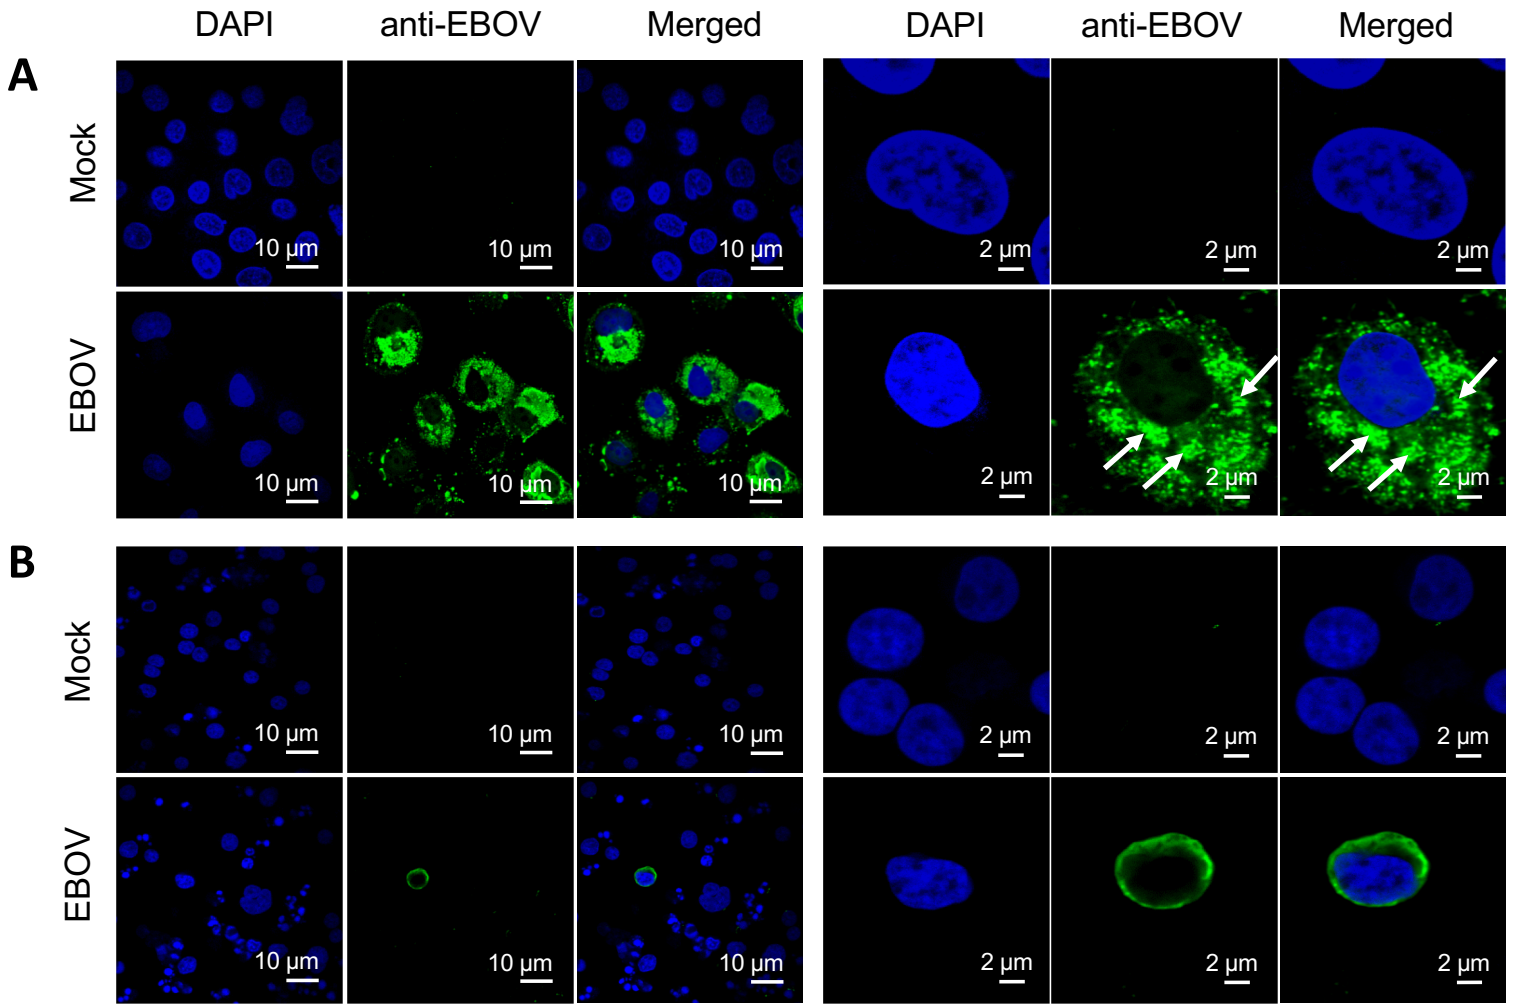

**Supplementary Figure 3. Confocal microscopy analysis of viral antigens.** Detection of EBOV antigens in Huh7 (**A**) and Jurkat (**B**) cells following exposure to the virus. Cells are stained with EBOV-specific antibodies (green) and nuclei are stained with DAPI (blue). White arrows indicate EBOV inclusion bodies.
