# Supplementary material for: Ebola virus-mediated T-lymphocyte depletion is the result of an abortive infection
Source: PubMed Central journal article supplement (PMC6812753; doi:10.1371/journal.ppat.1008068), 2019-10-24
Supplement: ppat.1008068.s004.pdf [file ppat.1008068.s004.pdf]

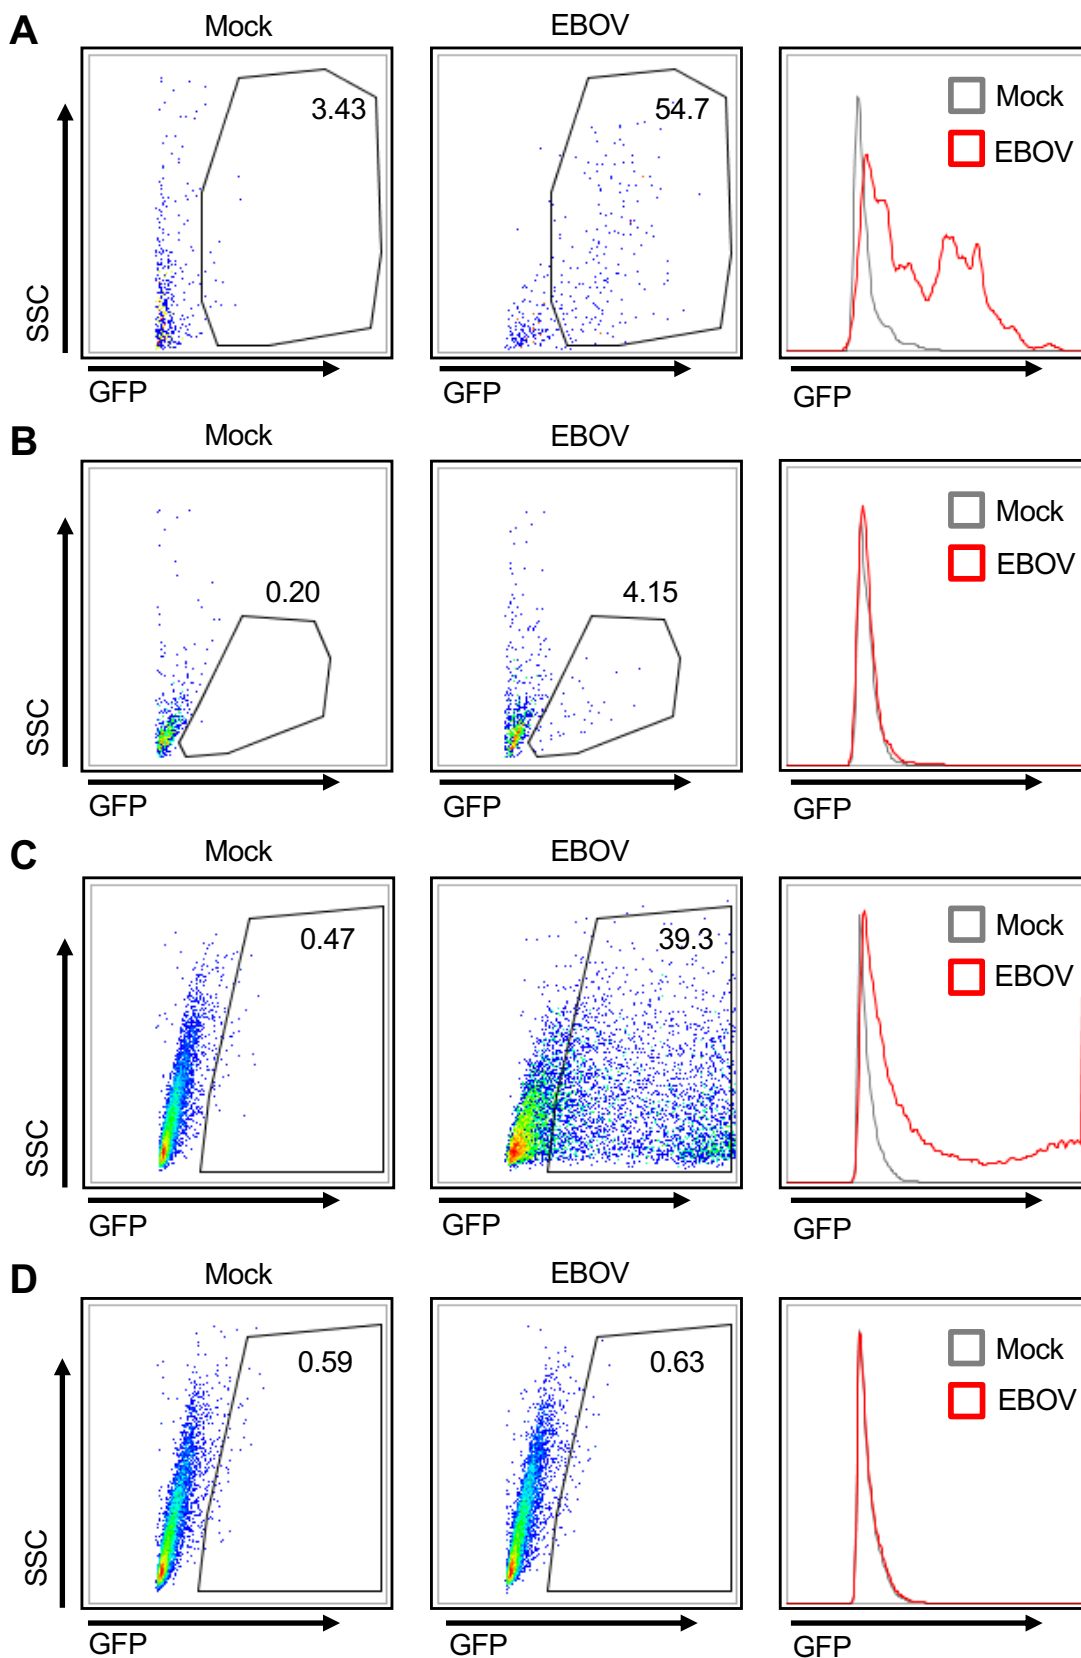

**Supplementary Figure 4. CD4<sup>+</sup> T-cells do not produce infectious virus.** (A, B) Flow cytometry analysis of GFP<sup>+</sup> Huh7 (A) and Jurkat (B) cells exposed to EBOV-GFP at MOI of 3 PFU/cell at 48 h post infection. (C, D) Flow cytometry analysis of Vero-E6 cells cultured with 50  $\mu$ l of cell-free supernatants collected from the EBOV-exposed Huh7 (C) or Jurkat (D) cells. Representative dot plots with indicated percentages of the gated populations and histograms. Two independent experiments in triplicates were performed.
