# Supplementary material for: Ebola virus-mediated T-lymphocyte depletion is the result of an abortive infection
Source: PubMed Central journal article supplement (PMC6812753; doi:10.1371/journal.ppat.1008068), 2019-10-24
Supplement: ppat.1008068.s006.pdf [file ppat.1008068.s006.pdf]

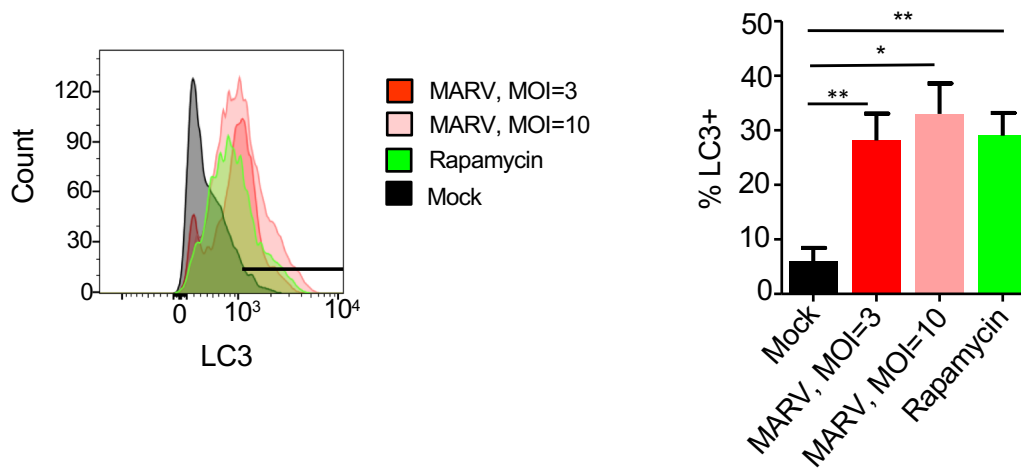

**Supplementary Figure 6. Incubation of primary human CD4<sup>+</sup> T-cells with MARV induced expression of LC3.** CD4<sup>+</sup> T cells from donor blood were incubated with MARV at MOI of 3 or 10 PFU/cell for 24 hours, and induction of autophagy assessed by staining for LC3 was analyzed by flow cytometry. Left: representative primary data. The gate indicates the position of LC3-positive cells based on the lack of staining with isotype control antibodies. Right, percentages of LC3<sup>+</sup> cells based on triplicate samples analyzed. Data for one of two donors analyzed shown. \*P<0.05, \*\* P<0.01, (Student's t-test).
